# Supplementary material for: A dual-target herbicidal inhibitor of lysine biosynthesis
Source: eLife. 2022 Jun 20;11:e78235. doi: 10.7554/eLife.78235 (PMC9208756; doi:10.7554/eLife.78235)
Supplement: Figure 2—source data 1. [file elife-78235-fig2-data1.xlsx]

## Sheet: Sheet1
AtDHDPS1					AtDHDPS2
[HBDTA] (M)	Replicate 1	Replicate 2	Replicate 3		[HBDTA] (M)	Replicate 1	Replicate 2	Replicate 3
0	96.6441	103.442	99.9139		0	102.8	98.6118	98.5884
0.0005	0.140293	0.182659	0.03292		0.0005	0.565205	0.101826	0.05279
0.00025	0	0.46394	0.179187		0.00025	0.012998	0.606264	0.627967
0.000125	31.1354	34.9726	31.8709		0.000125	37	31.9497	38.7936
6.25e-05	84.9956	82.5578	85.4262		6.25e-05	88.1993	88.6873	83.4622
3.125e-05	90.9545	95.2328	92.2186		3.125e-05	93.402	95.3975	96.2891
1.5625e-05	97.4692	93.8507	95.8162		1.5625e-05	94.4531	96.3348	97.4493
7.8125e-06	104.019	100.838	98.4137		7.8125e-06	102.683	98.2329	102.179
