# Supplementary material for: A dual-target herbicidal inhibitor of lysine biosynthesis
Source: eLife. 2022 Jun 20;11:e78235. doi: 10.7554/eLife.78235 (PMC9208756; doi:10.7554/eLife.78235)
Supplement: Figure 3—source data 1. [file elife-78235-fig3-data1.xlsx]

## Sheet: Panel A
AtDHDPR1					AtDHDPR2
[MBDTA-2] (M)	Replicate 1	Replicate 2	Replicate 3		[MBDTA-2] (M)	Replicate 1	Replicate 2	Replicate 3
0.0005	1.07443	0.84086	3.31672		0.00025	0	0	0
0.000125	9.10931	9.57646	6.54002		0.000125	0	0	0
6.25e-05	16.9106	17.2843	15.8829		6.25e-05	6.9696	6.57078	8.17261
3.125e-05	26.3937	19.8069	21.3298		3.125e-05	28.6695	33.7038	31.3174
1.5625e-05	38.6795	32.3731	39.824		1.5625e-05	41.0592	42.3014	44.034
7.8125e-06	47.1816	52.834	50.545		7.8125e-06	47.5319	48.0222	42.6283
3.90625e-06	60.6911	59.5148	61.8674		3.90625e-06	74.3053	69.3037	66.7211
1.95313e-06	71.6089	73.4101	65.5067		1.95313e-06	75.3514	77.7051	77.3782
9.76563e-07	80.5416	78.6301	81.865

## Sheet: Panel B
AtDHDPR1					AtDHDPR2
[HBDTA-2] (M)	Replicate 1	Replicate 2	Replicate 3		[HBDTA-2] (M)	Replicate 1	Replicate 2	Replicate 3
0.0005	0	0	0		0.0005	0	0	0
0.00025	8.06184	11.1304	12.2126		0.00025	8.78671	3.97383	7.21046
0.000125	83.913	74.0725	85.5121		0.000125	65.7442	68.4684	66.2412
6.25e-05	102.831	99.9662	99.029		6.25e-05	83.2512	84.1036	83.3398
3.125e-05	90.7488	98.2899	91.4155		3.125e-05	90.2469	87.4022	83.694
1.5625e-05	92.4396	102.073	99.3628		1.5625e-05	98.1835	99.6004	95.3498
