# Supplementary material for: A dual-target herbicidal inhibitor of lysine biosynthesis
Source: eLife. 2022 Jun 20;11:e78235. doi: 10.7554/eLife.78235 (PMC9208756; doi:10.7554/eLife.78235)
Supplement: Figure 4—source data 1. [file elife-78235-fig4-data1.xlsx]

## Sheet: Sheet1
AtDHDPR1					AtDHDPR2
[MBDTA-2] (M)	Replicate 1	Replicate 2	Replicate 3		[MBDTA-2] (M)	Replicate 1	Replicate 2	Replicate 3
0	106.236	99.1924	94.5714		0	102.208	98.9955	98.797
0.0005	0.497248	0.389225	0.068586		0.0005	0.506723	0.267437	0.408194
0.000125	7.03863	8.14458	6.70427		0.00025	3.27963	0.591177	0.774161
8e-05	40.6372	44.1621	43.6712		0.000125	1.10635	1.81576	2.32248
6.25e-05	64.0764	69.9491	67.1285		9.37497e-05	31.6421	35.4284	34.2601
3.125e-05	82.6461	85.3037	83.8463		6.25e-05	52.8921	51.0383	55.3173
1.5625e-05	90.1048	96.3204	90.4477		4.88754e-05	79.1755	80.555	84.7917
7.8125e-06	94.4771	100.821	94.2799		3.125e-05	100.388	100.12	99.6424
