# Supplementary material for: A dual-target herbicidal inhibitor of lysine biosynthesis
Source: eLife. 2022 Jun 20;11:e78235. doi: 10.7554/eLife.78235 (PMC9208756; doi:10.7554/eLife.78235)
Supplement: Figure 5—source data 1. [file elife-78235-fig5-data1.xlsx]

## Sheet: Sheet1
	Fresh Weight (mg)								Dry Weight (mg)
	Vehicle			Treated					Vehicle			Treated
Shoots	490	342	381	71	107	109		Shoots	50	43	37	10	10	8
Roots	155	100	118	44	33	58		Roots	14	16	15	7	10	7
